# Supplementary material for: Highly efficient generation of knock-in transgenic medaka by CRISPR/Cas9-mediated genome engineering
Source: PubMed Central journal article supplement (PMC5798193; doi:10.1186/s40851-017-0086-3), 2018-02-05
Supplement: 40851_2017_86_MOESM4_ESM.pdf [file 40851_2017_86_MOESM4_ESM.pdf]

## A sox5 5' side, forward integration

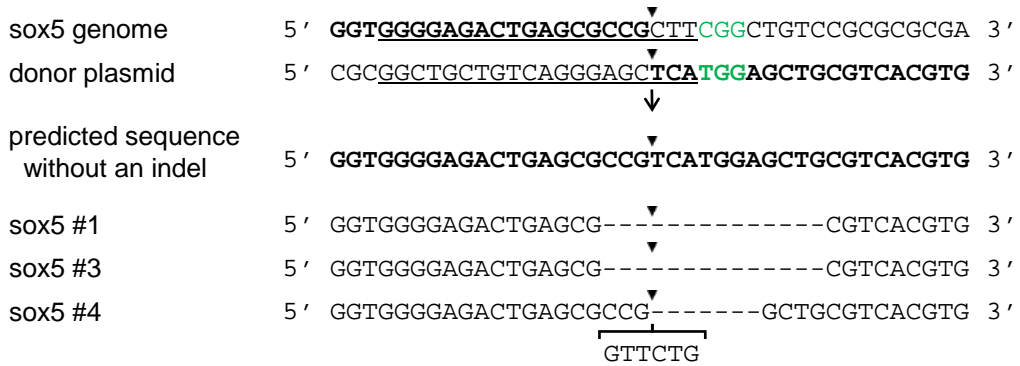

## B sox5 5' side, reverse integration

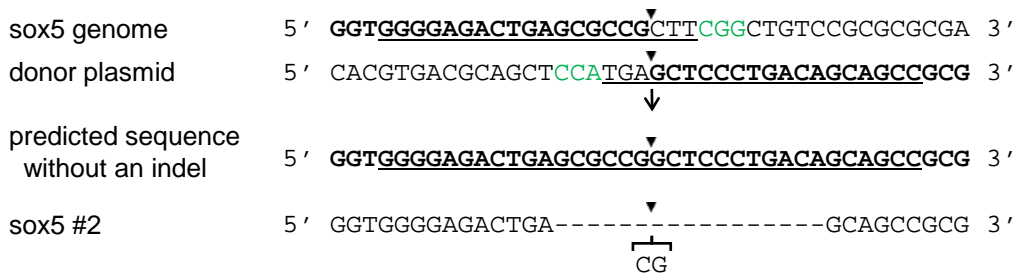

## C sox5 3' side, forward integration

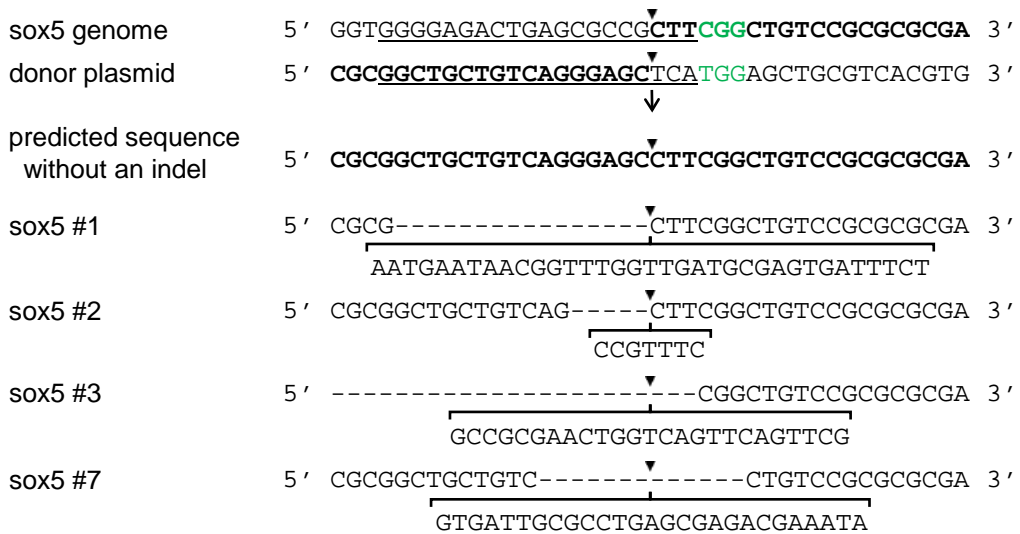

## D sox5 3' side, reverse integration

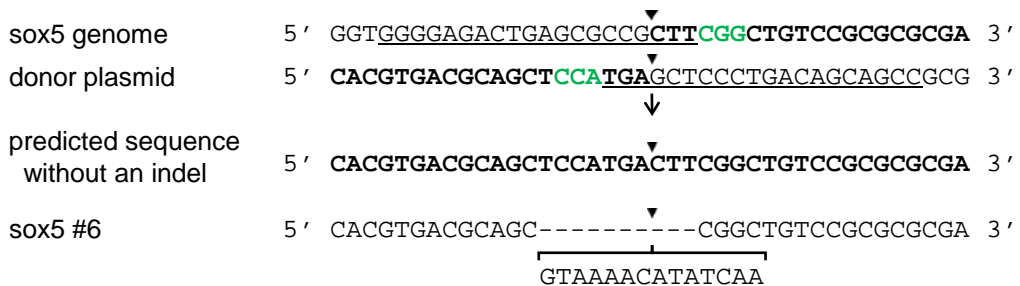

## E pax7a 5' side, forward integration

|                                        |                                                         |
|----------------------------------------|---------------------------------------------------------|
| pax7a genome                           | 5' TGAAGGCTCGATCAGTGTCCAGT <b>TGGGTGTTTTTGCCTGG</b> 3'  |
| donor plasmid                          | 5' CGCGGCTGCTGTCAGGGAGCT <b>TCATGGAGCTGCGTCACGTG</b> 3' |
|                                        | ↓                                                       |
| predicted sequence<br>without an indel | 5' TGAAGGCTCGATCAGTGT <b>CCTCATGGAGCTGCGTCACGTG</b> 3'  |
| pax7a #1                               | 5' TGAAGGCTCGATCAGTGT <b>CCTCATGGAGCTGCGTCACGTG</b> 3'  |
| pax7a #3                               | 5' TGAAGGCTCGATCAGTG---TCATGGAGCTGCGTCACGTG 3'          |
| pax7a #4                               | 5' TGAAGGCTCGATCAGTG---TCATGGAGCTGCGTCACGTG 3'          |
| pax7a #6                               | 5' TGAAGGCTCGATCA-----TCATGGAGCTGCGTCACGTG 3'           |

## F pax7a 5' side, reverse integration

|                                        |                                                        |
|----------------------------------------|--------------------------------------------------------|
| pax7a genome                           | 5' TGAAGGCTCGATCAGTGTCCAGT <b>TGGGTGTTTTTGCCTGG</b> 3' |
| donor plasmid                          | 5' CACGTGACGCAGCT <b>CCATGAGCTCCCTGACAGCAGCCGCG</b> 3' |
|                                        | ↓                                                      |
| predicted sequence<br>without an indel | 5' TGAAGGCTCGATCAGTGT <b>CCGCTCCCTGACAGCAGCCGCG</b> 3' |
| pax7a #2                               | 5' TGAAGGCTCGATCAGTGT <b>CCGCTCCCTGACAGCAGCCGCG</b> 3' |

## G pax7a 3' side, forward integration

|                                        |                                                                                                                                                                                                           |
|----------------------------------------|-----------------------------------------------------------------------------------------------------------------------------------------------------------------------------------------------------------|
| pax7a genome                           | 5' TGAAGGCTCGATCAGTGTCC <b>AGTGGGTGTTTTTGCCTGG</b> 3'                                                                                                                                                     |
| donor plasmid                          | 5' CGCGGCTGCTGTCAGGGAGCT <b>TCATGGAGCTGCGTCACGTG</b> 3'                                                                                                                                                   |
|                                        | ↓                                                                                                                                                                                                         |
| predicted sequence<br>without an indel | 5' CGCGGCTGCTGTCAGGGAG <b>CAGTTGGGTGTTTTTGCCTGG</b> 3'                                                                                                                                                    |
| pax7a #1                               | 5' CGCGGCTGC-----GTTGGGTGTTTTTGCCTGG 3'                                                                                                                                                                   |
|                                        | <div style="display: flex; align-items: center; justify-content: center;"> <div style="border: 1px solid black; padding: 2px; margin-right: 5px;">G</div> <div style="text-align: center;">↓</div> </div> |
| pax7a #6                               | 5' CGCGGCTGCTGTCAGGGAG <b>CAGTTGGGTGTTTTTGCCTGG</b> 3'                                                                                                                                                    |

## H pax7a 3' side, reverse integration

|                                        |                                                                                                                                                                                                                  |
|----------------------------------------|------------------------------------------------------------------------------------------------------------------------------------------------------------------------------------------------------------------|
| pax7a genome                           | 5' TGAAGGCTCGATCAGTGTCC <b>AGTGGGTGTTTTTGCCTGG</b> 3'                                                                                                                                                            |
| donor plasmid                          | 5' CACGTGACGCAGCT <b>CCATGAGCTCCCTGACAGCAGCCGCG</b> 3'                                                                                                                                                           |
|                                        | ↓                                                                                                                                                                                                                |
| predicted sequence<br>without an indel | 5' CACGTGACGCAGCT <b>CCATGAAGTTGGGTGTTTTTGCCTGG</b> 3'                                                                                                                                                           |
| pax7a #2                               | 5' CACGTGACGCAGCTCCAT---GTTGGGTGTTTTTGCCTGG 3'                                                                                                                                                                   |
| pax7a #3                               | 5' CACGTGACGCAGCTCCATG---TTGGGTGTTTTTGCCTGG 3'                                                                                                                                                                   |
|                                        | <div style="display: flex; align-items: center; justify-content: center;"> <div style="border: 1px solid black; padding: 2px; margin-right: 5px;">TTGGGTGT</div> <div style="text-align: center;">↓</div> </div> |
| pax7a #4                               | 5' CACGTGACGCAGCTCCATG---TTGGGTGTTTTTGCCTGG 3'                                                                                                                                                                   |
|                                        | <div style="display: flex; align-items: center; justify-content: center;"> <div style="border: 1px solid black; padding: 2px; margin-right: 5px;">TTGGGTGT</div> <div style="text-align: center;">↓</div> </div> |
| pax7a #5                               | 5' CACGTGACGCAGCTC-----AGTTGGGTGTTTTTGCCTGG 3'                                                                                                                                                                   |
